# Supplementary material for: Single-step fabrication of 3D hierarchical ZnO/ZnS heterojunction branched nanowires by MOCVD for enhanced photoelectrochemical water splitting
Source: Royal Society of Chemistry journal article supplement (doi:10.1039/c9ta13714a), 2020-01-01
Supplement: c9ta13714a1.pdf [file c9ta13714a1.pdf]

## Supporting Information

### **Single-step fabrication of 3D hierarchical ZnO/ZnS heterojunction branched nanowires by MOCVD for enhanced photoelectrochemical water splitting**

**Mostafa Afifi Hassan<sup>1</sup>, Aadil Waseem<sup>1</sup>, Muhammad Ali Johar<sup>1</sup>, Indrajit V. Bagal<sup>1</sup>, Jun-Seok Ha<sup>2</sup> and Sang-Wan Ryu<sup>1,2,\*</sup>**

**<sup>1</sup>Department of Physics, Chonnam National University, Gwangju 61186, Republic of Korea**

**<sup>2</sup>Optoelectronic Convergence Research Center, Chonnam National University, Gwangju 61186, Republic of Korea**

\* Corresponding authors

E-mail address: [sangwan@chonnam.ac.kr](mailto:sangwan@chonnam.ac.kr)

## Supplementary Information S1

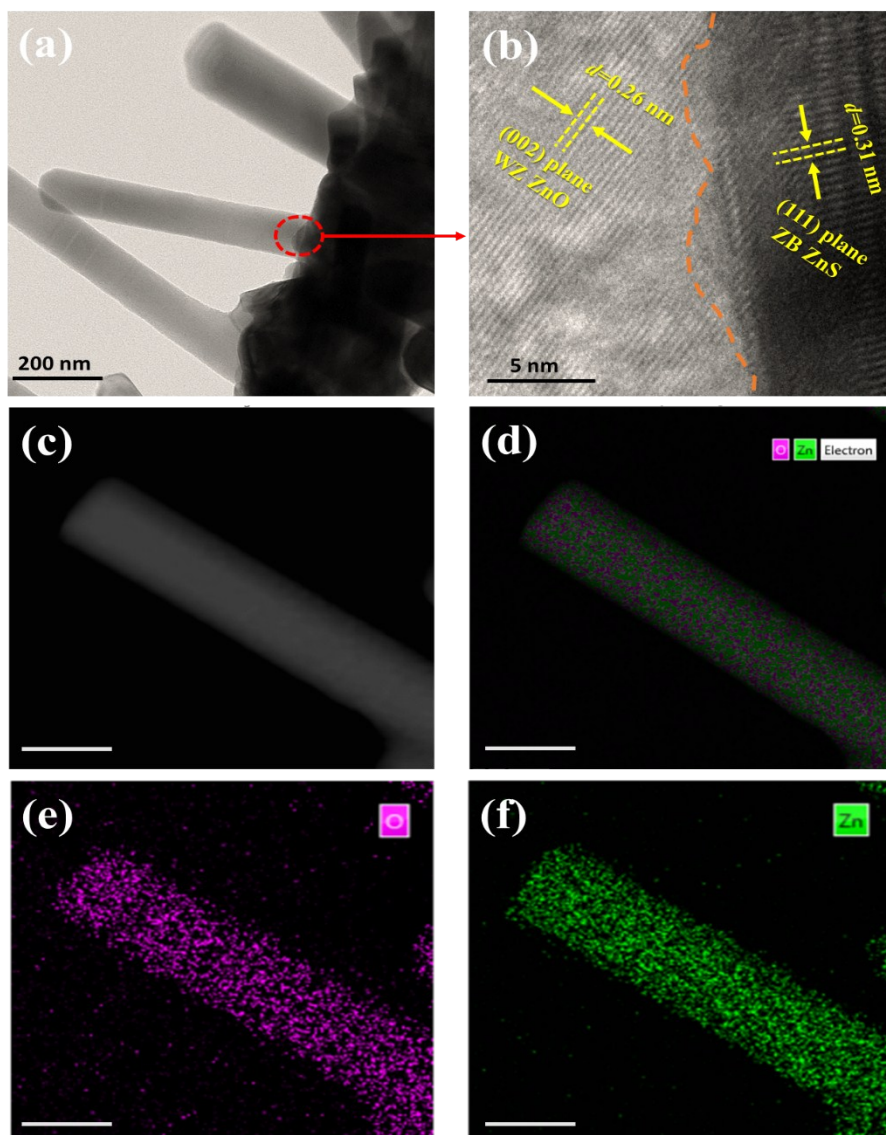

**Figure. S1.** High magnification TEM of ZnO branched NWs with the corresponding energy dispersive X-ray spectroscopy (EDS) mapping. The scale represents 1  $\mu$ m.

## Supplementary Information S2

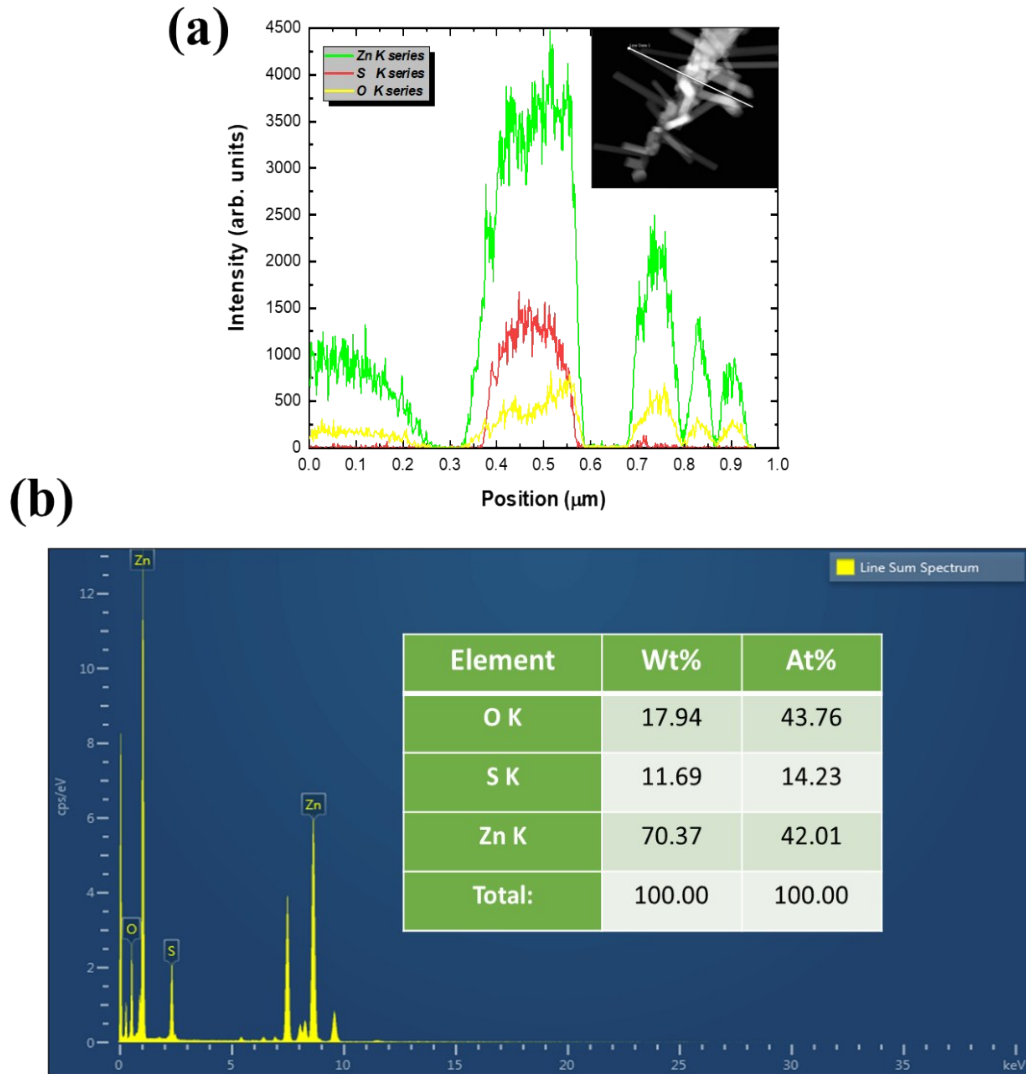

**Figure. S2.** Line scan profile of ZnO branched NWs along STEM image with the corresponding EDS analysis and elemental distribution.

### Supplementary Information S3

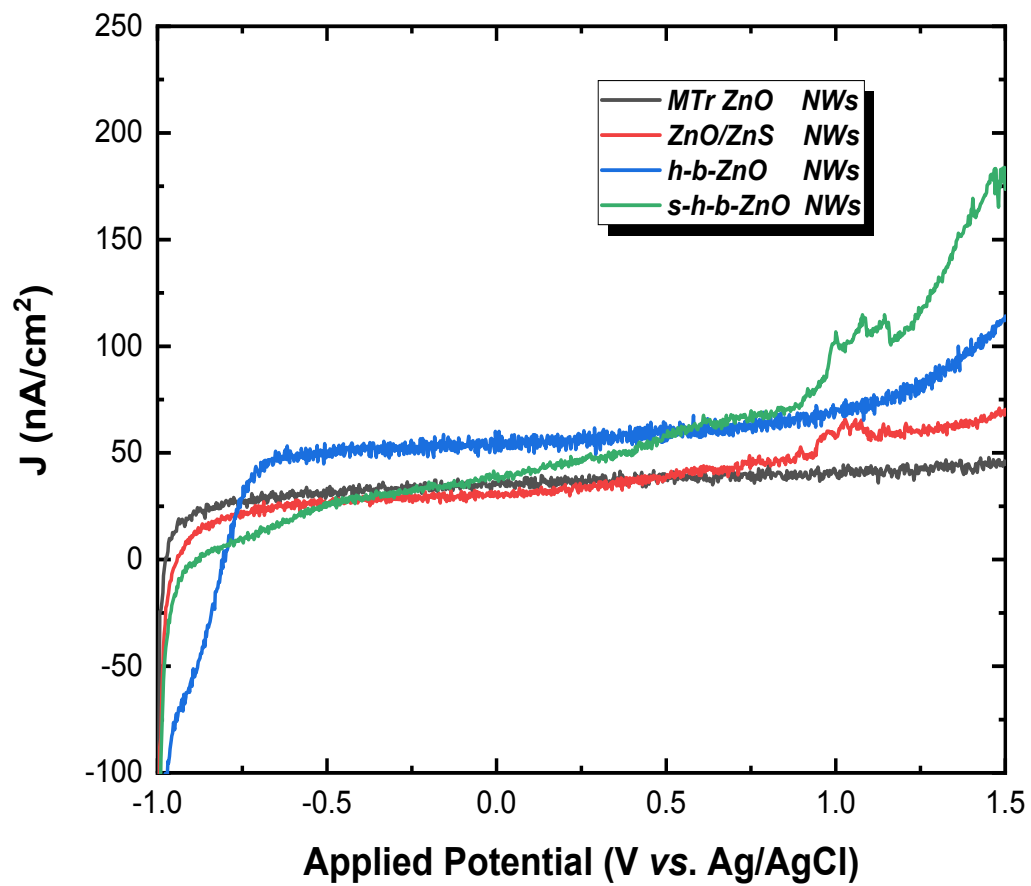

**Figure. S3.** The dark currents of all photoanodes.

## Supplementary Information S4

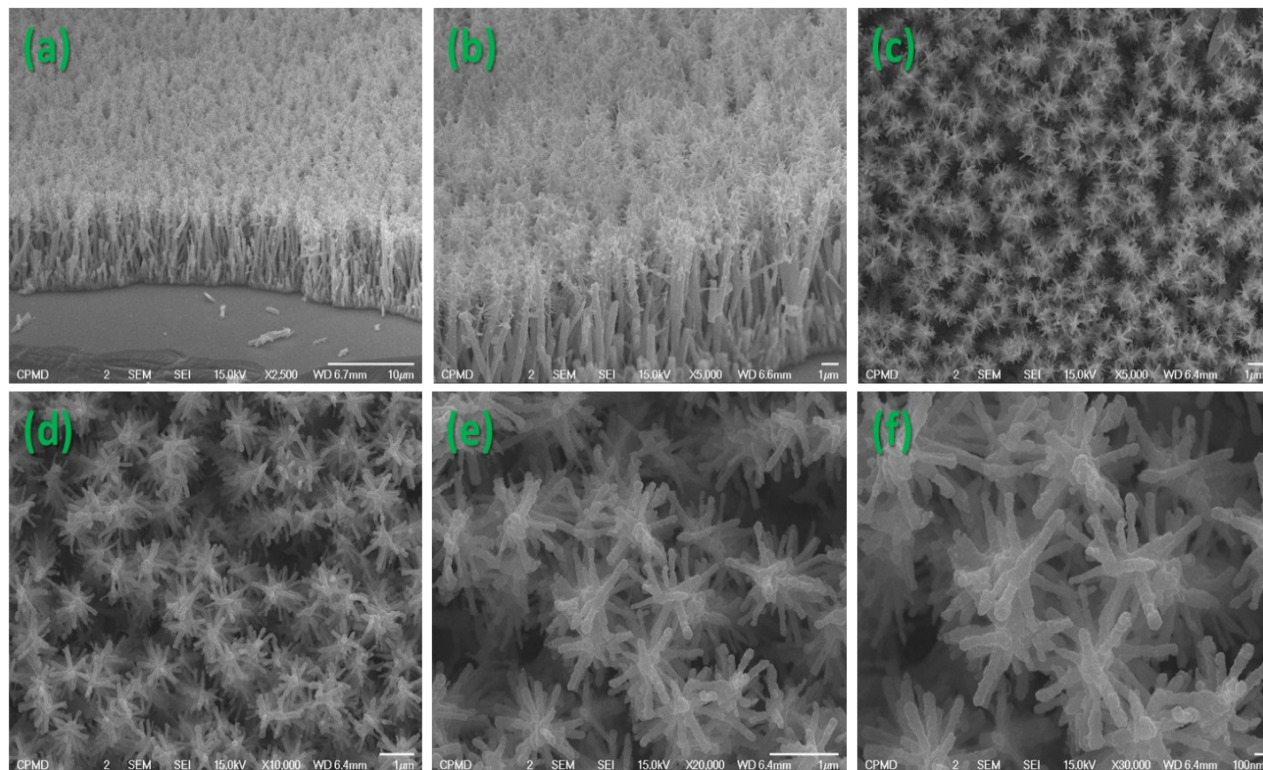

**Figure. S4.** SEM images with different magnifications for s-h-b-ZnO NWs photoanode after photoelectrochemical water splitting reaction.

## Supplementary Information S5

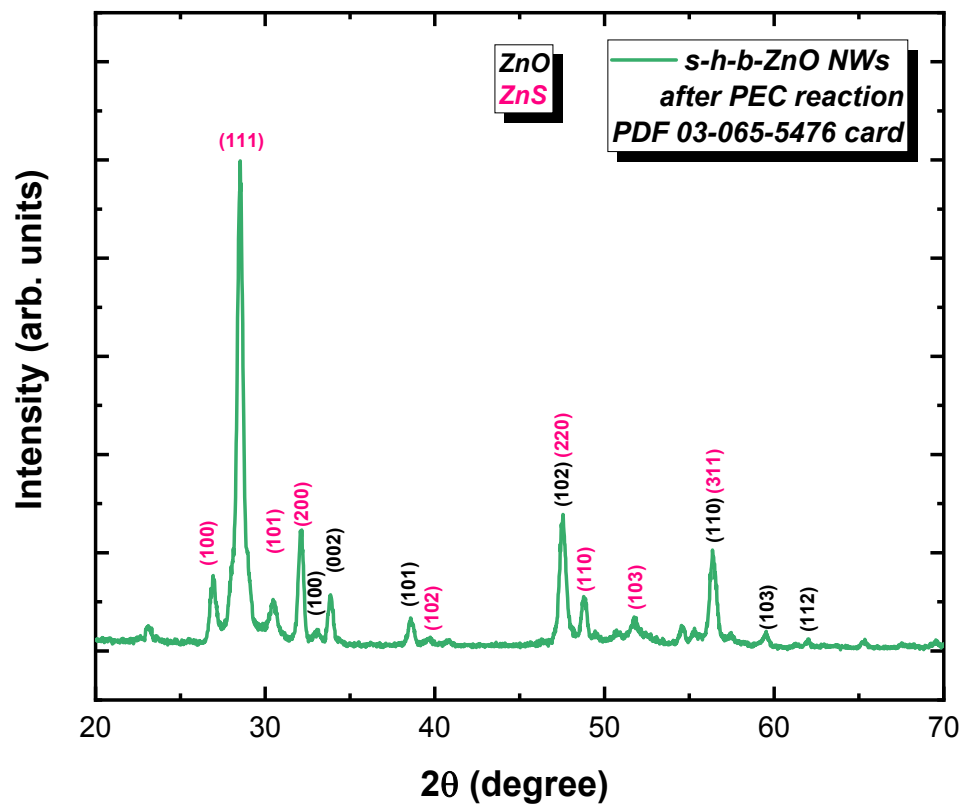

**Figure S5.** XRD pattern of s-h-b-ZnO NWs photoanode after photoelectrochemical water splitting reaction.
